# Supplementary material for: Crystalline architectures of C84 with tunable morphology and linearly polarized red emission
Source: Royal Society of Chemistry journal article supplement (doi:10.1039/d3nr05308c), 2023-11-23
Supplement: d3nr05308c1.pdf [file d3nr05308c1.pdf]

*Electronic Supplementary information*

Crystalline architectures of C<sub>84</sub> with tunable morphology and linearly polarized red emission

*Feng Wang,<sup>a,b</sup> Botao Zhu,<sup>a</sup> Jie Xiong,<sup>a</sup> Shuo Wu,<sup>a</sup> Jiaxin Sun,<sup>a</sup> Hailin Cong,<sup>\*b</sup> and Lai Feng<sup>\*a</sup>*

*<sup>a</sup>Soochow Institute for Energy and Materials Innovation (SIEMIS), School of Energy, Soochow University, Suzhou 215006, China*

*<sup>b</sup>Laboratory for New Fiber Materials and Modern Textile, Growing Base for State Key Laboratory, College of Chemical Engineering, Qingdao University, Qingdao 266071, China*

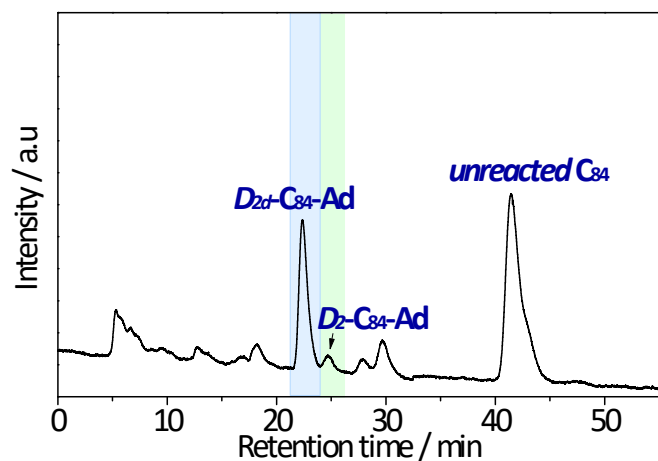

**Figure S1.** HPLC profiles of the reaction mixture of  $C_{84}$  isomers with cyclopentadiene.

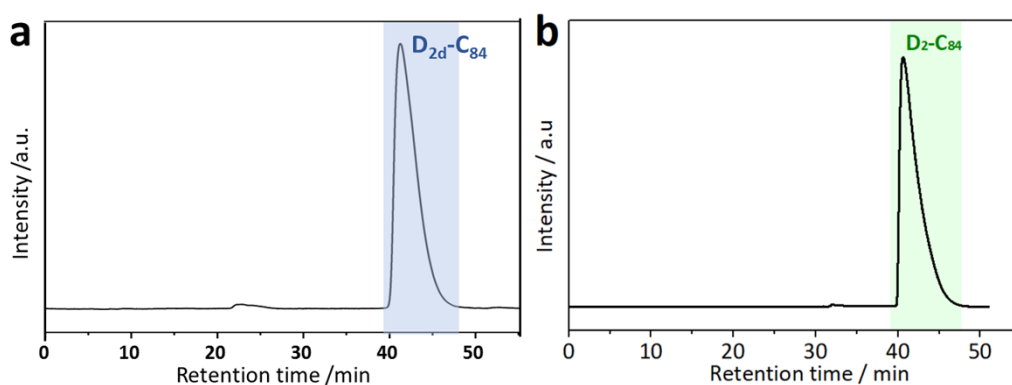

**Figure S2.** HPLC profiles of the isolated isomers: (a)  $D_{2d}$ - $C_{84}$  and (b)  $D_2$ - $C_{84}$ .

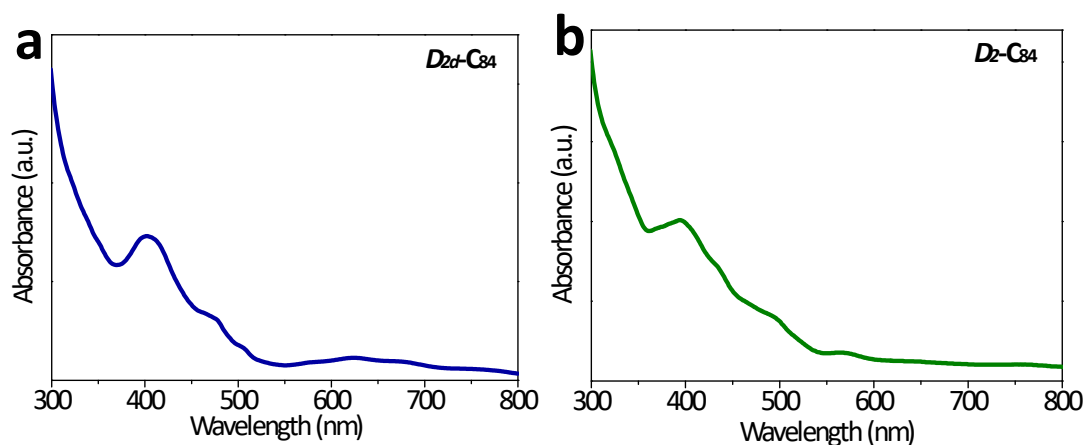

**Figure S3.** UV-vis spectra of isolated isomers: (a)  $D_{2d}$ - $C_{84}$  and (b)  $D_2$ - $C_{84}$ .

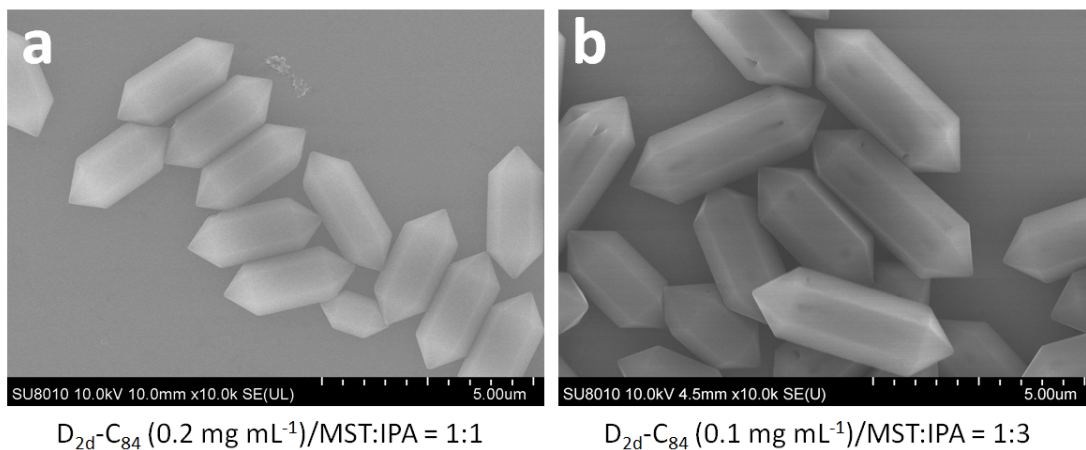

**Figure S4.** (a,b) SEM images of *r*-HPs of  $D_{2d}\text{-}C_{84}$  prepared under different conditions. Note: As seen in Figure S4, the size of *r*-HPs is increasing with the decreasing of  $C_{84}$  concentration, while their aspect ratio remains constant.

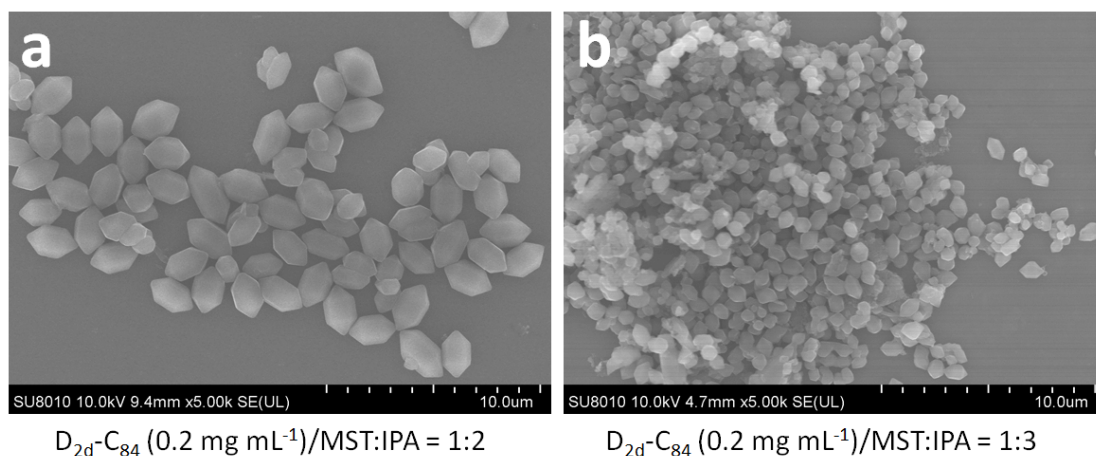

**Figure S5.** (a,b) SEM images of *r*-HPs of  $D_{2d}\text{-}C_{84}$  prepared under different conditions. Note: As seen in Figure S5, the size and aspect ratio of *r*-HPs are decreasing with the increasing of relative volume of IPA.

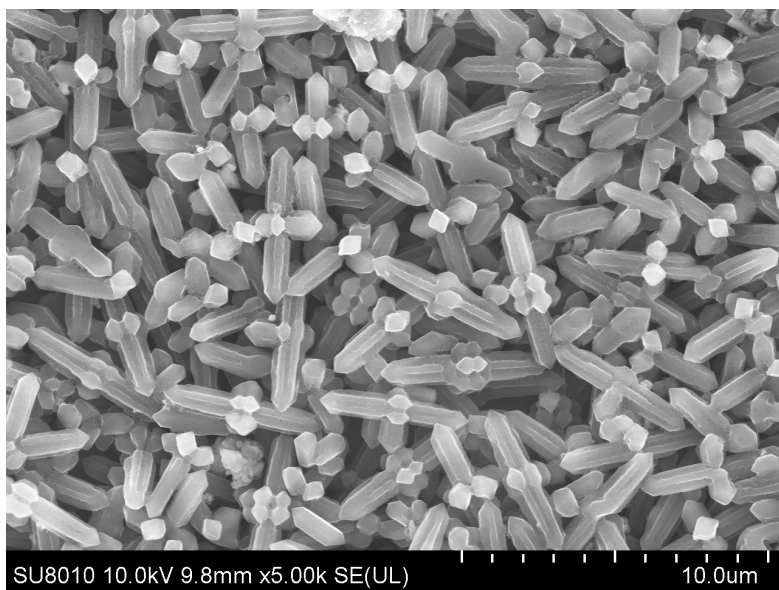

**Figure S6.** SEM images of *c*-HP of  $D_{2d}$ - $C_{84}$  prepared under optimal conditions ( $D_{2d}$ - $C_{84}$  ( $0.2 \text{ mg mL}^{-1}$ )/MST:IPA = 1:1).

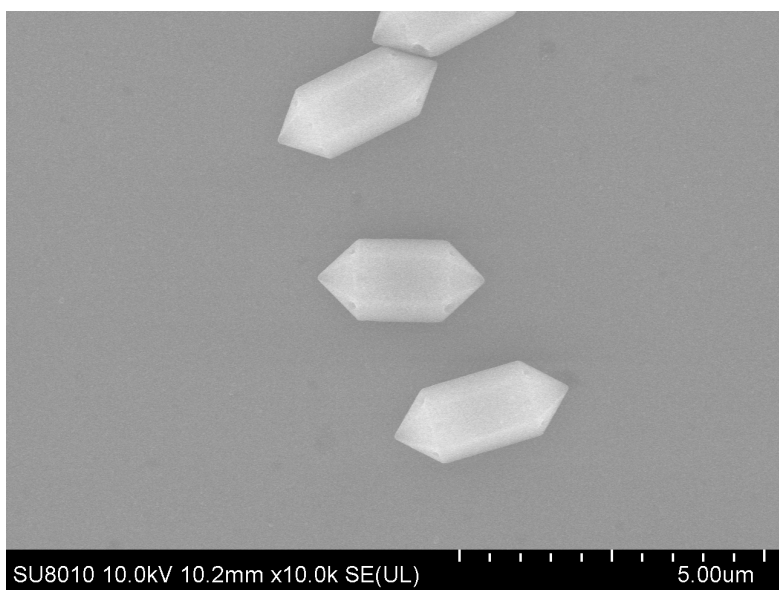

**Figure S7.** SEM images of *r*-HPs of  $D_2$ - $C_{84}$  prepared under optimal conditions ( $D_2$ - $C_{84}$  ( $0.2 \text{ mg mL}^{-1}$ )/MST:IPA = 1:1).

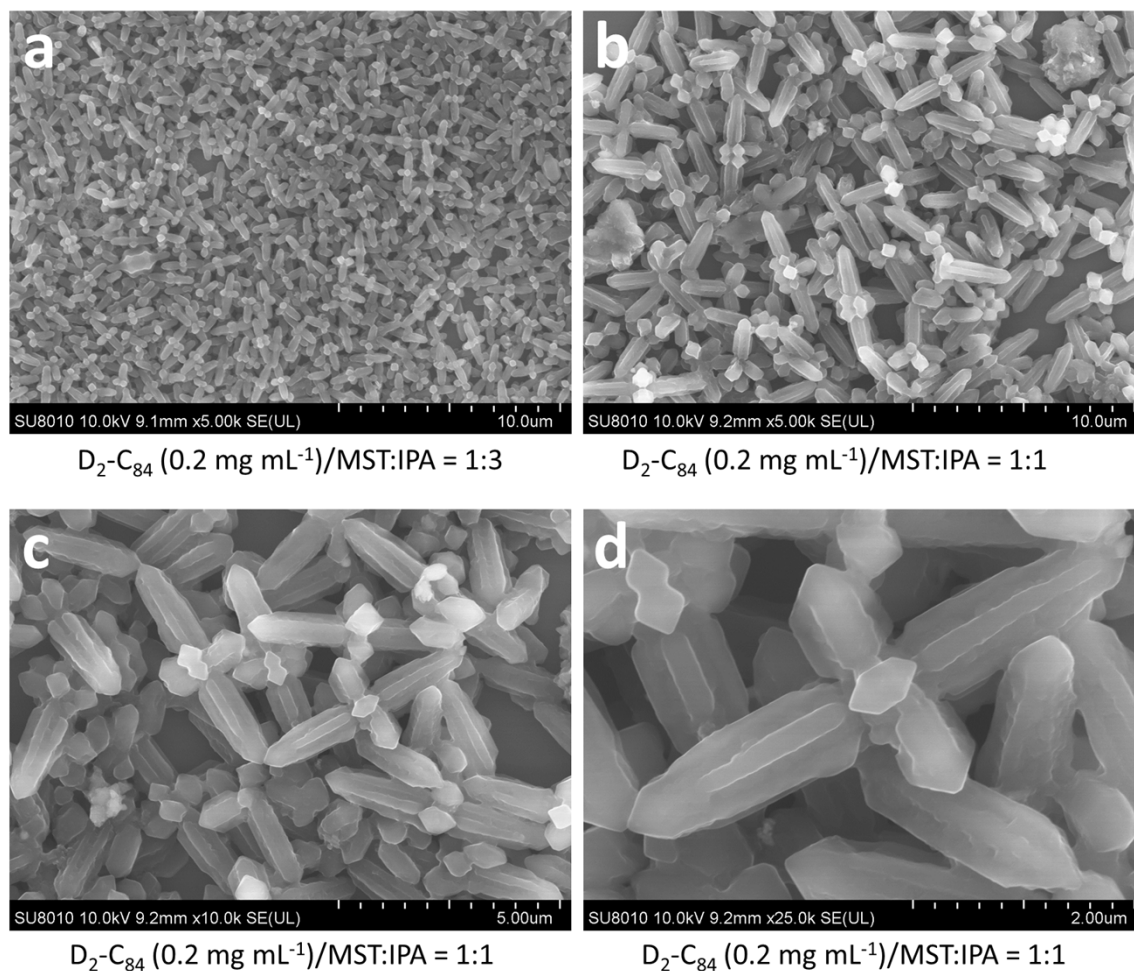

**Figure S8.** (a and b,c,d) SEM images of *c*-HPs of  $D_{2d}$ - $C_{84}$  prepared under different conditions.

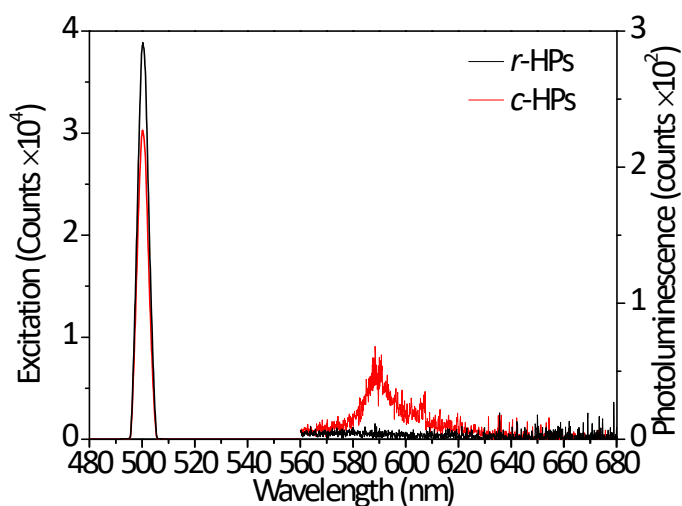

**Figure S9.** Absolute PL quantum yields measured for *r*-HPs and *c*-HPs of  $D_{2d}$ - $C_{84}$  (both dispersed in cyclohexane solution at room temperature).

**Table S1.** Fitting results based on the biexponential equation of

$$I(t) = A_1 \exp\left(\frac{-t}{\tau_1}\right) + A_2 \exp\left(\frac{-t}{\tau_2}\right) \text{ for the transient PL spectra of the } r\text{-HP and } c\text{-HP.}$$

| Device       | $\tau_1$ (ns) | $A_1$ (%) | $\tau_2$ (ns) | $A_2$ (%) | $\tau_{\text{avg}}$ (ns) <sup>a</sup> | $R^2$ |
|--------------|---------------|-----------|---------------|-----------|---------------------------------------|-------|
| <i>r</i> -HP | 4.38          | 10.74     | 0.46          | 89.26     | 2.56                                  | 0.992 |
| <i>c</i> -HP | 3.85          | 6.57      | 0.44          | 93.43     | 1.74                                  | 0.993 |

$$\tau_{\text{avg}} = \frac{\sum A_i \tau_i^2}{\sum A_i \tau_i}$$
